# Supplementary material for: Can the continuous symmetry measure TPR6 measure the axial magnetic anisotropy in hexacoordinated Co(ii) SIMs?
Source: Royal Society of Chemistry journal article supplement (doi:10.1039/d3nj01865b), 2023-01-01
Supplement: d3nj01865b1.pdf [file d3nj01865b1.pdf]

## Can continuous symmetry measure TPR6 measure the axial magnetic anisotropy in the hexacoordinated Co(II) SIMs?

Yulia P. Tupolova,<sup>†</sup> Vladimir E. Lebedev,<sup>‡</sup> Igor N. Shcherbakov,<sup>\*,†</sup>

<sup>†</sup> Department of Chemistry, Southern Federal University, 7, Zorge Str., Rostov-on-Don, 344090, Russia.

### Electronic Supplementary Information

**Table S1** Experimental magnetic anisotropy parameter D (cm<sup>-1</sup>) for series of hexacoordinated mononuclear Co(II) coordination compounds are taken from the corresponding references (column Ref.). TPR6 and OC6 are continuous symmetry measures of the structure deformation towards ideal trigonal prismatic (TP) and octahedral (OC) symmetry, correspondingly, calculated with SHAPE 2.1 program<sup>1</sup>). Atomic coordinates are taken from Cambridge structure database (for compounds with listed CSD code) or from CIF files from supplementary materials of the corresponding articles (marked with “-“ in CSD code column).

| Compound                                                                                                                            | D <sub>exp</sub> | OC6    | TPR6  | Δ       | CSD code | Ref |
|-------------------------------------------------------------------------------------------------------------------------------------|------------------|--------|-------|---------|----------|-----|
| Co(Cl <sub>2</sub> Gm) <sub>3</sub> (BC <sub>6</sub> H <sub>3</sub> -3,5-(CF <sub>3</sub> ) <sub>2</sub> ) <sub>2</sub>             | -65              | 15.720 | 0.128 | -15.592 | YUFZOQ10 | 2   |
| [Co <sup>II</sup> (tppm)][BPh <sub>4</sub> ] <sub>2</sub>                                                                           | -97.2            | 15.893 | 0.554 | -15.339 | WOWNUU   | 3   |
| Co(Cl <sub>2</sub> Gm) <sub>3</sub> (Bn-C <sub>16</sub> H <sub>33</sub> ) <sub>2</sub>                                              | -65              | 12.431 | 0.557 | -11.874 | PUQنيا   | 2   |
| [Co <sup>II</sup> (tppm)][ClO <sub>4</sub> ] <sub>2</sub> ·2CH <sub>3</sub> CN·H <sub>2</sub> O                                     | -80.7            | 14.920 | 0.588 | -14.332 | HIRLAY   | 4   |
| [Co <sup>II</sup> (PzOx) <sub>3</sub> (BC <sub>6</sub> H <sub>5</sub> )]Cl                                                          | -82              | 16.272 | 0.828 | -15.444 | QIWKAK   | 5   |
| [Co <sup>II</sup> (AcPzOx) <sub>3</sub> (BC <sub>6</sub> H <sub>5</sub> )DMF] <sub>2</sub> (B <sub>10</sub> Cl <sub>10</sub> )      | -85              | 15.245 | 0.862 | -14.383 | FUGQEG   | 6   |
| [Co <sup>II</sup> (TFIMTH)](NO <sub>3</sub> ) <sub>2</sub>                                                                          | -72              | 11.882 | 0.866 | -11.016 | BOJHIS01 | 7   |
| [Co(AcMeImd) <sub>3</sub> BPh]ClO <sub>4</sub>                                                                                      | -102.5           | 13.462 | 0.905 | -12.557 | FOFLAQ   | 8   |
| [Co <sup>II</sup> (pprz)]                                                                                                           | -31              | 10.866 | 1.382 | -9.484  | AYAQIC   | 9   |
| {Na[Co(ctam)]}(BPh <sub>4</sub> ) <sub>3</sub>                                                                                      | -75.8            | 9.293  | 1.793 | -7.500  | TARXOC   | 10  |
| [Co <sup>II</sup> (AcPyOx) <sub>3</sub> BC <sub>6</sub> H <sub>5</sub> ]ClO <sub>4</sub>                                            | -86              | 10.042 | 2.006 | -8.036  | CAWCUB   | 11  |
| [HNEt <sub>3</sub> ][Co <sup>II</sup> Co <sup>III</sup> <sub>3</sub> (bhpm) <sub>6</sub> ]                                          | -115             | 9.548  | 2.221 | -7.327  | GEXQIL   | 12  |
| [Co <sup>II</sup> (hpy)][BPh <sub>4</sub> ] <sub>2</sub> ·3CH <sub>2</sub> Cl <sub>2</sub>                                          | -107.5           | 8.237  | 2.471 | -5.766  | WOWPAC   | 3   |
| [Co(tlt)]X·S (X = BF <sub>4</sub> <sup>-</sup> ) 4                                                                                  | -127.6           | 7.373  | 2.757 | -4.616  | -        | 13  |
| [Co(tlt)]X·S (X = ClO <sub>4</sub> <sup>-</sup> , S = 2CH <sub>3</sub> OH) 3                                                        | -116.0           | 7.301  | 3.016 | -4.285  | -        | 13  |
| [H(NEt <sub>3</sub> ) <sup>+</sup> ][Co <sup>II</sup> Co <sup>III</sup> <sub>3</sub> (hpmp) <sub>6</sub> ] <sup>-</sup>             | -24.7            | 7.778  | 3.171 | -4.607  | QUJGEJ   | 14  |
| [Co(tlt)]X·S (X = ZnCl <sub>4</sub> <sup>2-</sup> , S = CH <sub>3</sub> OH) 2                                                       | -87.20           | 6.875  | 3.185 | -3.690  | -        | 13  |
| [Co(ctam)][CoCl <sub>4</sub> ]                                                                                                      | -11              | 6.789  | 3.240 | -3.549  | TARXIW   | 10  |
| [H(DBU)] <sup>+</sup> [Co <sup>II</sup> Co <sup>III</sup> <sub>3</sub> (hpmp) <sub>6</sub> ] <sup>-</sup>                           | -35.2            | 7.521  | 3.339 | -4.182  | QUJGOT   | 14  |
| [Co(tlt)]X·S (X = CoCl <sub>4</sub> <sup>2-</sup> , S = CH <sub>3</sub> CN) 1                                                       | -60.60           | 5.833  | 3.835 | -1.998  | -        | 13  |
| [H(NEt <sub>3</sub> ) <sup>+</sup> ][Co <sup>II</sup> Co <sup>III</sup> <sub>3</sub> (L <sup>2</sup> R) <sub>6</sub> ] <sup>-</sup> | -21.6            | 7.248  | 4.406 | -2.842  | QUJGUZ   | 14  |
| [Co(pntdt)(CH <sub>3</sub> CN)](ClO <sub>4</sub> ) <sub>2</sub>                                                                     | -25.80           | 12.849 | 5.14  | -7.709  | ZUWGUW   | 15  |
| [Co(bggN)(NCS) <sub>2</sub> ] <sup>-</sup> ·DMSO                                                                                    | -78.7            | 10.11  | 5.4   | -4.710  | -        | 16  |
| [Co(bggN)Cl <sub>2</sub> ] <sup>-</sup> ·H <sub>2</sub> O                                                                           | -68.4            | 11.29  | 6.15  | -5.140  | PODCIX   | 17  |
| [Co(doym) <sub>2</sub> ](ClO <sub>4</sub> ) <sub>2</sub>                                                                            | -66.4            | 5.89   | 6.352 | 0.462   | BENBAA   | 18  |
| [Co(nah) <sub>2</sub> ]                                                                                                             | -18.4            | 5.906  | 6.559 | 0.653   | BECDOF   | 19  |
| [Co(hch) <sub>2</sub> ] <sup>-</sup> ·2THF                                                                                          | -30.4            | 5.539  | 7.109 | 1.570   | BECDIZ   | 19  |
| {[Co(bmb)(2,2'-bipy)]·0.5DMF} <sub>n</sub>                                                                                          | -56.2            | 6.818  | 7.269 | 0.451   | IDOPAV   | 20  |
| [Co(hbah) <sub>2</sub> ] <sup>-</sup> ·CH <sub>2</sub> Cl <sub>2</sub>                                                              | -27.4            | 4.991  | 7.823 | 2.832   | BECDUL   | 19  |
| [Co(pyrtpy) <sub>2</sub> ](BPh <sub>4</sub> ) <sub>2</sub>                                                                          | -53.6            | 4.476  | 9.1   | 4.624   | ECIJOS   | 21  |
| [Co(bbp) <sub>2</sub> ][Co(NCS) <sub>4</sub> ] <sup>-</sup> ·4DMF                                                                   | 39.00            | 4.718  | 9.286 | 4.568   | CUPHIH   | 22  |
| [Co(C <sub>n</sub> -terpy) <sub>2</sub> ](BF <sub>4</sub> ) <sub>2</sub>                                                            | 47.50            | 4.11   | 9.389 | 5.279   | SONDUX   | 23  |

|                                                                             |                    |       |        |        |          |    |
|-----------------------------------------------------------------------------|--------------------|-------|--------|--------|----------|----|
| [Co(2-Himap) <sub>2</sub> ]                                                 | 36.70              | 3.243 | 9.508  | 6.265  | LEPFAQ   | 24 |
| [Co(HATN)(hfac) <sub>2</sub> ](CH <sub>2</sub> Cl <sub>2</sub> )            | 60.00 <sup>a</sup> | 1.8   | 10.495 | 8.695  | PIBDUC   | 25 |
| [Co(dmoyp) <sub>2</sub> ](ClO <sub>4</sub> ) <sub>2</sub> ·MeCN             | 56.40              | 4.368 | 10.742 | 6.374  | BEMZUR   | 18 |
| [Co(dmoyp) <sub>2</sub> ](ClO <sub>4</sub> ) <sub>2</sub>                   | 68.10              | 4.085 | 10.882 | 6.797  | BEMZOL   | 18 |
| [Co(ddoyp) <sub>2</sub> ](ClO <sub>4</sub> ) <sub>2</sub>                   | 61.10              | 4.206 | 10.95  | 6.744  | BEMZIF   | 18 |
| [Co(ddoyb) <sub>2</sub> ](ClO <sub>4</sub> ) <sub>2</sub>                   | 74.90              | 4.043 | 11.405 | 7.362  | BENBEE   | 18 |
| [Co(ddoym) <sub>2</sub> ](ClO <sub>4</sub> ) <sub>2</sub>                   | 62.90              | 4.311 | 11.486 | 7.175  | BEKXEX   | 18 |
| [Co(phf)Cl <sub>2</sub> ]                                                   | 35.2               | 1.853 | 11.82  | 9.967  | KUYZEM   | 26 |
| [Co(tlt)(NCS) <sub>2</sub> ]                                                | 34.70              | 1.799 | 12.039 | 10.24  | -        | 13 |
| [Co(dimphen)(NCS) <sub>2</sub> ]                                            | 82.90              | 2.977 | 12.158 | 9.181  | UKACUH   | 27 |
| [Co(mtpd) <sub>4</sub> (NO <sub>3</sub> ) <sub>2</sub> ]                    | 71.50              | 0.58  | 12.811 | 12.231 | NIBQEX   | 28 |
| [Co(bbp)(NCS) <sub>2</sub> (DMF)]·2DMF                                      | 69.50              | 1.395 | 13.483 | 12.088 | CUPHED   | 22 |
| [Co(hfac) <sub>2</sub> (bpy)]                                               | 37.10              | 0.677 | 13.863 | 13.186 | YOZQEM   | 29 |
| [Co(mtxqn) <sub>2</sub> (SCN) <sub>2</sub> ]                                | 36.60              | 1.231 | 14.134 | 12.903 | ROZGUL   | 30 |
| [Co(biq)(μ <sub>1,5</sub> -dca) <sub>2</sub> ] <sub>n</sub>                 | 66.40              | 0.665 | 14.310 | 13.645 | URANUZ   | 31 |
| Et <sub>4</sub> N[Co(hfac) <sub>3</sub> ]                                   | 117.80             | 0.182 | 14.539 | 14.357 | EXEHUM   | 32 |
| [Co <sup>II</sup> ( <sup>Me</sup> bik) <sub>2</sub> (NCSe) <sub>2</sub> ]   | 66.32              | 0.169 | 14.784 | 14.615 | -        | 33 |
| [Co <sup>II</sup> ( <sup>Me</sup> bik) <sub>2</sub> (NCS) <sub>2</sub> ]    | 59.84              | 0.171 | 14.787 | 14.616 | -        | 33 |
| [Co(bmim) <sub>4</sub> (tcm) <sub>2</sub> ]                                 | 80.10              | 0.16  | 15.082 | 14.922 | -        | 34 |
| [Co(py) <sub>4</sub> (Cl) <sub>2</sub> ]·H <sub>2</sub> O                   | 68.20              | 0.344 | 15.533 | 15.189 | QELMEZ02 | 35 |
| [Co(abpt) <sub>2</sub> (tcm) <sub>2</sub> ]                                 | 48.00              | 0.855 | 15.670 | 14.815 | EQINID   | 36 |
| [Co(phpl) <sub>4</sub> (NO <sub>3</sub> ) <sub>2</sub> ]                    | 71.40              | 0.168 | 15.787 | 15.619 | LECWAS01 | 28 |
| <i>cis</i> -[Co( <i>dmphen</i> ) <sub>2</sub> (NCS) <sub>2</sub> ]-0.25EtOH | 98.00              | 0.908 | 15.977 | 15.069 | PEMMUR   | 37 |
| [Co(py) <sub>4</sub> (Br) <sub>2</sub> ]                                    | 61.50              | 0.881 | 16.104 | 15.223 | CURSUG   | 35 |
| [Co(hfac) <sub>2</sub> (MBIm) <sub>2</sub> ]                                | 67.65              | 0.096 | 16.185 | 16.089 | VUJZEI   | 38 |
| [Co(hfac) <sub>2</sub> (DMF) <sub>2</sub> ]                                 | 71.47              | 0.093 | 16.236 | 16.143 | VUJZIM   | 38 |
| {[Co(bimb)(H <sub>2</sub> O) <sub>4</sub> ](pmb)·2DMF} <sub>n</sub>         | 57.5               | 0.134 | 16.266 | 16.132 | IDOQUQ   | 20 |
| [Co(bim) <sub>4</sub> (tcm) <sub>2</sub> ]                                  | 46.10              | 0.078 | 16.349 | 16.271 | -        | 34 |
| [Co(acac) <sub>2</sub> (H <sub>2</sub> O) <sub>2</sub> ]                    | 57.00              | 0.149 | 16.369 | 16.220 | CODAAC03 | 39 |
| [Co(py) <sub>4</sub> (SCN) <sub>2</sub> ]                                   | 46.80              | 0.103 | 16.399 | 16.296 | ITPCO03  | 35 |
| [Co(hfac) <sub>2</sub> (Spy) <sub>2</sub> ]                                 | 59.78              | 0.051 | 16.464 | 16.413 | VUJZAE   | 38 |
| [Co(hfac) <sub>2</sub> (MeCN) <sub>2</sub> ]                                | 64.46              | 0.062 | 16.578 | 16.516 | VUJYUX   | 38 |

<sup>a</sup> this compound was excluded from correlation, see below.

Ligand names from the compound's formula:

Gm – glyoxime; tppm - tris[6-(1*H*-pyrazol-1-yl)pyridin-2-yl]methanol; PzOx – pyrazoloxime; AcPzOx - 2-acetylpyrazoloxime; TFIMTH - (P(S))<sub>3</sub>{[N(CH<sub>3</sub>)N=CHC<sub>3</sub>H<sub>3</sub>]<sub>3</sub>}; AcMeImd - 1-(1-methyl-1*H*-imidazol-2-yl)ethanone oxime; pprz - 6,6'-((1*Z*)-((piperazine-1,4-diylbis(propane-3,1-diyl))bis(azanylylidene))bis(methanylylidene))bis(2-methoxyphenol); ctam - 6,6',6''-(cyclohexane-1,3,5-triyltris((azanylylidene)methyllylidene))tris(*N*-*t*-butylpyridine-3-carboxamide); AcPyOx - 2-acetylpyridineoxime; bhpm - 4-bromo-2-((2-hydroxy-1-phenylethylimino)methyl)phenol; hpy - tris(2,2'-bipyrid-6-yl)methanol; tlt - tris(pyridylhydrazonyl)phosphorylsulfide; hpmp - 2-((2-hydroxy-1-phenylethylimino methyl)phenol); DBU - 1,8-diazabicyclo[5.4.0]undec-7-ene; pntdt - 1,5,13,17,22-pentaaazatricyclo[15.2.2.17,11]docosa-7,9,11(22)-triene; bggn - biscondensation product of diacetyl and 2-hydrazinyl-4,6-dimethylpyrimidine; doym - 2,6-bis(4,5-dihydro-1,3-oxazol-2-yl)-4-(4-methylphenyl)pyridine; nah - nicotinic acid(6-hydroxymethyl-pyridin-2-ylmethylene)hydrazide; hch - 3-hydroxy-naphthalene-2-carboxylic acid (6-hydroxymethyl-pyridin-2-ylmethylene) hydrazide; bmd - 2,2'-[benzene-1,4-diylbis(methanediylsulfanediyl)]dibenzoic acid; hbah - 2-hydroxy-benzoic acid(6-hydroxymethyl-pyridin-2-ylmethylene)hydrazide; pyrtpy - 4'-pyrrolidine-2,2':6',2''-terpyridine; bbp - 2,6-bis(1*H*-benzo[*d*]imidazol-2-yl)pyridine; C<sub>n</sub>-terpy - 4'-alkoxy-2,2':6',2''-terpyridine; 2-Himap - *o*-[(1*H*-imidazol-2-yl)methylideneamino]phenol; HATN - 5,6,11,12,17,18-hexaazatrinaphthylene; hfac – hexafluoroacetylacetone; dmoyp - 2,6-bis(4,4-dimethyl-4,5-dihydro-1,3-oxazol-2-yl)pyridine; ddoyp - 2,6-bis(4,5-dihydro-1,3-oxazol-2-yl)pyridine; ddoyb - 2,6-bis(4,4-dimethyl-4,5-dihydro-1,3-oxazol-2-yl)-4,4'-bipyridine; ddoym - 2,6-bis(4,4-dimethyl-4,5-dihydro-1,3-oxazol-2-yl)-4-(4-methylphenyl)pyridine; phf - 1,1'-bis(1-((pyrid-2-ylmethylene)hydrazono)ethyl)ferrocene; dimphen - [1,2-bis(9-methyl-1,10-phenanthrolin-2-yl)ethane]; mtpd – 4-methylpyridine; bbp - 2,6-bis(1*H*-benzo[*d*]imidazol-2-yl)pyridine;

bpy - 2,2'-dipyridyl; mtxqn - 8-methoxyquinoline; biq - 2,2'-biquinoline; dca - dicyanamide anion; <sup>Me</sup>bik = bis(1-methylimidazol-2-yl)ketone; bmim - 1-benzyl-2-methylbenzimidazole; tcm - tricyanomethanide ion; py – pyridine; abpt - 4-amino-3,5-bis(2-pyridyl)-1,2,4-triazole; phpl - 3-phenylpyrazole; dmphen - 2,9-dimethyl-1,10-phenanthroline; MbIm - 5,6-dimethylbenzimidazole; bimb - 1,4-bis(benzoimidazo-1-ly)benzene); pmb - 2,2'-(1,4-phenylenebis(methylene))bis(sulfanediyl)dinicotinic acid; bim - 1-benzylimidazole; acac – acetylacetonate; Spy - 4-styrylpyridine.

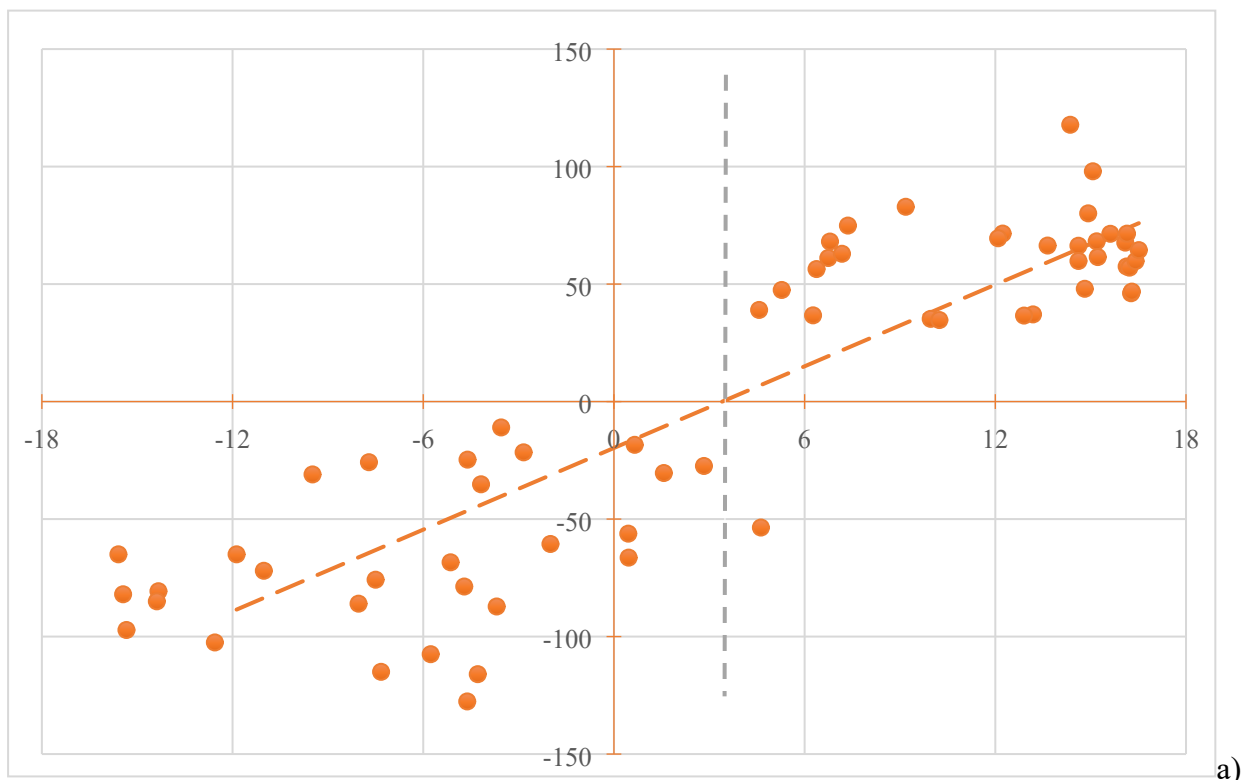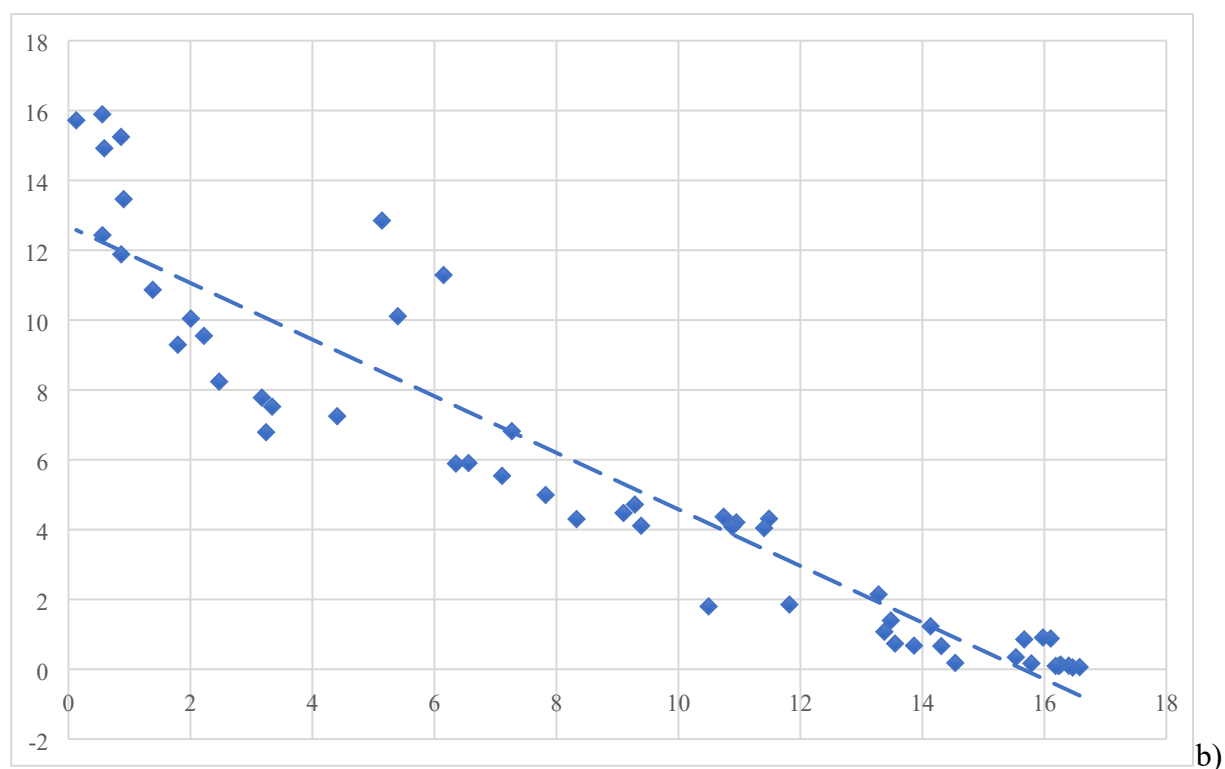

**Figure S1** a)  $D$  vs  $\Delta = \text{TPR6-OC6}$  (difference between continuous symmetry measures TPR6 and OC6), correlation coefficient  $R = 0.88$ ; b) correlation between OC6 and TPR6 CSMs ( $R = 0.94$ )

**Computational study for [Co(HATN)(hfac)<sub>2</sub>](CH<sub>2</sub>Cl<sub>2</sub>)<sup>25</sup> (CSD code PIBDUC)**

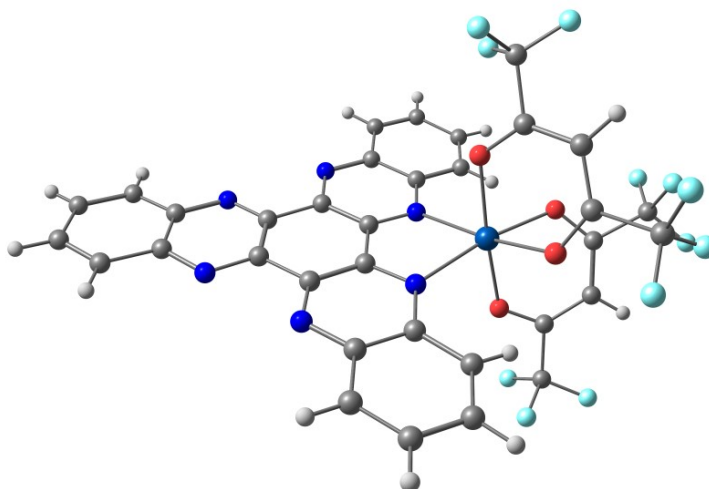

**Figure S2.** Molecule of the compound [Co(HATN)(hfac)<sub>2</sub>](CH<sub>2</sub>Cl<sub>2</sub>)<sup>25</sup> (CSD code PIBDUC) (solvent molecule is excluded, nuclei coordinates are frozen at the positions as found from the single crystal X-ray diffraction study).

Compound [Co(HATN)(hfac)<sub>2</sub>]<sup>25</sup> was subjected to quantum-chemical modelling of the zero field splitting parameters (ZFS) at the CAS(7,5) level of theory (details of the calculations are given further). Nuclei coordinates were taken from single crystal X-ray diffraction experiment, corresponding cif-file was obtained from Cambridge Structure Database (CSD)<sup>40</sup>.

First five quartet excitations (spin-orbit free excited states) were found at 1060, 1551, 7292, 7418, 7738 cm<sup>-1</sup>. Calculated energies of the lowest spin-orbit states (Kramers doublets) are 0.0, 109.7, 1135.4, 1345.3 cm<sup>-1</sup>.

Ground state is well-separated from the quartet excited states, so ZFS spin-Hamiltonian can be considered applicable for this compound. Also applicable is effective Hamiltonian approximation used in ORCA program for extraction of the anisotropy parameters from relativistic states and relativistic energies). Calculated within this approximation anisotropy parameters are:  $D = +49.5$  cm<sup>-1</sup> with rather high rhombicity,  $E/D = 0.28$ .

Calculated composition of the ground spin-orbit (Kramer's) states are: 80% ( $S=3/2, M_S=+1/2$ ) and 80% ( $S=3/2, M_S=-1/2$ ), while composition of the first excited Kramer's doublet is 90% ( $S=3/2, M_S=+3/2$ ) and 90% ( $S=3/2, M_S=-3/2$ ). Such ordering of the SOC states (stabilization of the states with smaller spin projection value) also supports the easy magnetization plane case and positive value of  $D$  parameter for this compound.

Also in agreement with this conclusion are the calculated principal values of  $g$ -tensor:

$$g_x = 2.398 \quad g_y = 2.700 \quad g_z = 2.084 \quad (g_{\text{iso}} = 2.394).$$

This result is in discrepancy with the experimental value evaluated in <sup>25</sup> for this compound by fitting magnetic susceptibility data (-60 cm<sup>-1</sup>). That's why this compound was excluded from the correlation.

#### Computational details

ORCA 4 program<sup>41, 42</sup> was employed to perform theoretical calculations of the electronic structure of several Co(II) complexes within post-Hartree–Fock multi-reference wavefunction approach based on state-averaged complete active space self-consistent field calculations (SA-CASSCF) )<sup>43-46</sup>. Scalar relativistic effects were account for using a standard second-order Douglas–Kroll–Hess (DKH) procedure<sup>47</sup>. Segmented all-electron relativistically contracted version of Ahlrichs polarized triple-zeta basis set, def2-TZVP<sup>48-50</sup>, was used for all atoms. To improve the calculation time, the resolution of the identity approximation with corresponding correlation fitting of the basis set<sup>51</sup> was employed. The CASSCF active space was constructed from 5 MOs with predominant contributions of 3d-AOs from the Co(II) center and 7 electrons, corresponding to metal ion CAS(7, 5). Ten quartets and 40 doublet states were included in the WF expansion. Spin–orbit effects were included using the quasi-degenerate perturbation theory (QDPT)<sup>52</sup>.

#### References

1. M. Llunell, D. Casanova, J. Cirera, P. Alemany and S. Alvarez, SHAPE (2.1); Universitat de Barcelona: Barcelona, Spain, 2013.
2. V. V. Novikov, A. A. Pavlov, A. S. Belov, A. V. Vologzhanina, A. Savitsky and Y. Z. Voloshin, *J. Phys. Chem. Lett.*, 2014, **5**, 3799.
3. B. Yao, M. K. Singh, Y.-F. Deng, Y.-N. Wang, K. R. Dunbar and Y.-Z. Zhang, *Inorg. Chem.*, 2020, **59**, 8505-8513.
4. B. Yao, Y.-F. Deng, T. Li, J. Xiong, B.-W. Wang, Z. Zheng and Y.-Z. Zhang, *Inorg. Chem.*, 2018, **57**, 14047-14051.
5. V. V. Novikov, A. A. Pavlov, Y. V. Nelyubina, M.-E. Boulon, O. A. Varzatskii, Y. Z. Voloshin and R. E. P. Winpenny, *J. Am. Chem. Soc.*, 2015, **137**, 9792-9795.
6. A. S. Belov, Y. Z. Voloshin, A. A. Pavlov, Y. V. Nelyubina, S. A. Belova, Y. V. Zubavichus, V. V. Avdeeva, N. N. Efimov, E. A. Malinina, K. Y. Zhizhin and N. T. Kuznetsov, *Inorg. Chem.*, 2020, **59**, 5845-5853.
7. S. Gomez-Coca, E. Cremades, N. Aliaga-Alcalde and E. Ruiz, *J. Am. Chem. Soc.*, 2013, **135**, 7010-7018.
8. A. A. Pavlov, D. Y. Aleshin, S. A. Savkina, A. S. Belov, N. N. Efimov, J. Nehr Korn, M. Ozerov, Y. Z. Voloshin, Y. V. Nelyubina and V. V. Novikov, *ChemPhysChem*, 2019, **20**, 1001-1005.
9. Y. Peng, T. Bodenstein, K. Fink, V. Mereacre, C. E. Anson and A. K. Powell, *Phys. Chem. Chem. Phys.*, 2016, **18**, 30135-30143.
10. T. J. Ozumerzifon, I. Bhowmick, W. C. Spaller, A. K. Rappé and M. P. Shores, *Chem. Commun.*, 2017, **53**, 4211-4214.
11. A. A. Pavlov, S. A. Savkina, A. S. Belov, Y. V. Nelyubina, N. N. Efimov, Y. Z. Voloshin and V. V. Novikov, *Inorg. Chem.*, 2017, **56**, 6943-6951.
12. Y.-Y. Zhu, C. Cui, Y.-Q. Zhang, J.-H. Jia, X. Guo, C. Gao, K. Qian, S.-D. Jiang, B.-W. Wang, Z.-M. Wang and S. Gao, *Chem. Sci.*, 2013, **4**, 1802-1806.
13. A. Landart-Gereka, M. M. Quesada-Moreno, I. F. Díaz-Ortega, H. Nojiri, M. Ozerov, J. Krzystek, M. A. Palacios and E. Colacio, *Inorg. Chem. Front.*, 2022, **9**, 2810-2831.

14. Y. Y. Zhu, Y. Q. Zhang, T. T. Yin, C. Gao, B. W. Wang and S. Gao, *Inorg. Chem.*, 2015, **54**, 5475.
15. E. Zahradníková, R. Herchel, I. Šalitroš, I. Císařová and B. Drahoš, *Dalton Trans.*, 2020, **49**, 9057-9069.
16. Y. P. Tupolova, I. N. Shcherbakov, D. V. Korchagin, V. V. Tkachev, V. E. Lebedev, L. D. Popov, K. V. Zakharov, A. N. Vasiliev, A. V. Palii and S. M. Aldoshin, *J. Phys. Chem. C*, 2020, **124**, 25957-25966.
17. Y. P. Tupolova, I. N. Shcherbakov, L. D. Popov, V. E. Lebedev, V. V. Tkachev, K. V. Zakharov, A. N. Vasiliev, D. V. Korchagin, A. V. Palii and S. M. Aldoshin, *Dalton Trans.*, 2019, **48**, 6960-6970.
18. Z.-Y. Ding, Y.-S. Meng, Y. Xiao, Y.-Q. Zhang, Y.-Y. Zhu and S. Gao, *Inorg. Chem. Front.*, 2017, **4**, 1909-1916.
19. Y. Peng, V. Mereacre, C. E. Anson, Y. Zhang, T. Bodenstein, K. Fink and A. K. Powell, *Inorg. Chem.*, 2017, **56**, 6056-6066.
20. Z. Chen, L. Yin, X. Mi, S. Wang, F. Cao, Z. Wang, Y. Li, J. Lu and J. Dou, *Inorg. Chem. Front.*, 2018, **5**, 2314-2320.
21. R. F. Higgins, B. N. Livesay, T. J. Ozumerzifon, J. P. Joyce, A. K. Rappé and M. P. Shores, *Polyhedron*, 2018, **143**, 193-200.
22. S. Ghosh, S. Kamilya, M. Das, S. Mehta, M.-E. Boulon, I. Nemeč, M. Rouzières, R. Herchel and A. Mondal, *Inorg. Chem.*, 2020, **59**, 7067-7081.
23. F. Kobayashi, R. Ohtani, M. Nakamura, L. F. Lindoy and S. Hayami, *Inorg. Chem.*, 2019, **58**, 7409-7415.
24. D. Sertphon, K. S. Murray, W. Phonstri, J. Jover, E. Ruiz, S. G. Telfer, A. Alkaş, P. Harding and D. J. Harding, *Dalton Trans.*, 2018, **47**, 859-867.
25. M. A. Lemes, F. Magnan, B. Gabidullin and J. Brusso, *Dalton Trans.*, 2018, **47**, 4678-4684.
26. Y. P. Tupolova, I. N. Shcherbakov, L. D. Popov, R. B. Morgunov, D. V. Korchagin, V. E. Lebedev, A. V. Palii and S. M. Aldoshin, *Dalton Trans.*, 2020, **49**, 15592-15596.
27. H. Ohmagari, M. Nakaya, K. Tanaka, H. Zenno, R. Akiyoshi, Y. Sekine, Y. Zhang, K. S. Min, M. Hasegawa, L. F. Lindoy and S. Hayami, *Dalton Trans.*, 2021, **50**, 494-498.
28. J. Zhou, J. Song, A. Yuan, Z. Wang, L. Chen and Z.-W. Ouyang, *Inorg. Chim. Acta*, 2018, **479**, 113-119.
29. E. Y. Misochko, A. V. Akimov, D. V. Korchagin, J. Nehr Korn, M. Ozerov, A. V. Palii, J. M. Clemente-Juan and S. M. Aldoshin, *Inorg. Chem.*, 2019, **58**, 16434-16444.
30. X.-F. Ma, H.-L. Wang, Z.-H. Zhu, H.-H. Zou, B. Liu, Z. Wang, Z.-W. Ouyang and F.-P. Liang, *ACS Omega*, 2019, **4**, 20905-20910.
31. A. Kliuikov, O. Bukrynov, E. Čižmár, L. Váhovská, S. Vitushkina, E. Samol'ová and I. Potočňák, *New J. Chem.*, 2021, **45**, 7117-7128.
32. A. V. Palii, D. V. Korchagin, E. A. Yureva, A. V. Akimov, E. Y. Misochko, G. V. Shilov, A. D. Talantsev, R. B. Morgunov, S. M. Aldoshin and B. S. Tsukerblat, *Inorg. Chem.*, 2016, **55**, 9696-9706.
33. J.-R. Jiménez, B. Xu, H. El Said, Y. Li, J. von Bardeleben, L.-M. Chamoreau, R. Lescouëzec, S. Shova, D. Visinescu, M.-G. Alexandru, J. Cano and M. Julve, *Dalton Trans.*, 2021, **50**, 16353-16363.
34. A. Świtlicka, J. Palion-Gazda, B. Machura, J. Cano, F. Lloret and M. Julve, *Dalton Trans.*, 2019, **48**, 1404-1417.
35. Y.-F. Deng, M. K. Singh, D. Gan, T. Xiao, Y. Wang, S. Liu, Z. Wang, Z. Ouyang, Y.-Z. Zhang and K. R. Dunbar, *Inorg. Chem.*, 2020, **59**, 7622-7630.
36. R. Herchel, L. Váhovská, I. Potočňák and Z. Trávníček, *Inorg. Chem.*, 2014, **53**, 5896-5898.
37. J. Vallejo, I. Castro, R. Ruiz-García, J. Cano, M. Julve, F. Lloret, G. De Munno, W. Wernsdorfer and E. Pardo, *J. Am. Chem. Soc.*, 2012, **134**, 15704-15707.

38. X.-C. Huang, J.-X. Li, Y.-Z. Chen, W.-Y. Wang, R. Xu, J.-X. Tao, D. Shao and Y.-Q. Zhang, *Chem. Asian J.*, 2020, **15**, 1469-1477.
39. S. Gómez-Coca, A. Urtizberea, E. Cremades, P. J. Alonso, A. Camón, E. Ruiz and F. Luis, *Nat. Commun.*, 2014, **5**, 4300.
40. C. R. Groom, I. J. Bruno, M. P. Lightfoot and S. C. Ward, *Acta Crystallogr. Sect. B*, 2016, **72**, 171-179.
41. F. Neese, *Wiley Interdisciplinary Reviews: Computational Molecular Science*, 2012, **2**, 73-78.
42. F. Neese, *WIREs Comput. Mol. Sci.*, 2022, DOI: <https://doi.org/10.1002/wcms.1606>, e1606.
43. B. O. Roos, P. R. Taylor and P. E. M. Siegbahn, *Chem. Phys.*, 1980, **48**, 157-173.
44. S. Per, H. Anders, R. Björn and L. Bernard, *Phys. Scr.*, 1980, **21**, 323.
45. P. E. M. Siegbahn, J. Almlöf, A. Heiberg and B. O. Roos, *J. Chem. Phys.*, 1981, **74**, 2384-2396.
46. C. Angeli, R. Cimiraglia, S. Evangelisti, T. Leininger and J. P. Malrieu, *J. Chem. Phys.*, 2001, **114**, 10252-10264.
47. B. A. Hess, *Phys. Rev. A*, 1986, **33**, 3742-3748.
48. A. Schafer, C. Huber and R. Ahlrichs, *J. Chem. Phys.*, 1994, **100**, 5829-5835.
49. A. Schafer, H. Horn and R. Ahlrichs, *J. Chem. Phys.*, 1992, **97**, 2571-2577.
50. F. Weigend and R. Ahlrichs, *Phys. Chem. Chem. Phys.*, 2005, **7**, 3297-3305.
51. F. Neese, *J. Comput. Chem.*, 2003, **24**, 1740-1747.
52. D. Ganyushin and F. Neese, *J. Chem. Phys.*, 2006, **125**, 024103.
